# Supplementary material
Source: Springer Nature journal article supplement (https://www.springermedizin.de/resource/supplementary/13075_2013_4082_MOESM2_ESM.pdf/9696002)

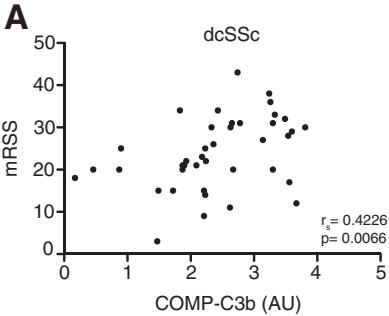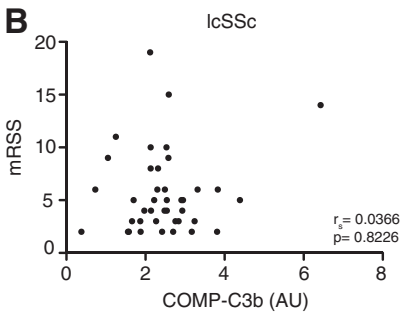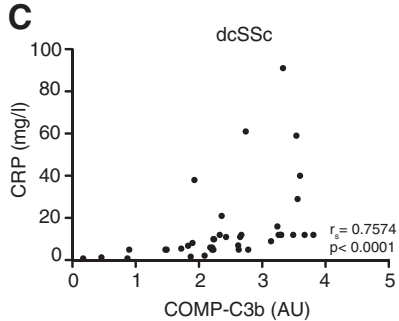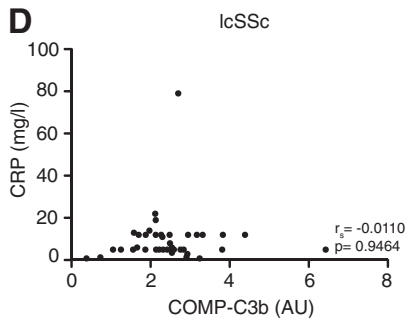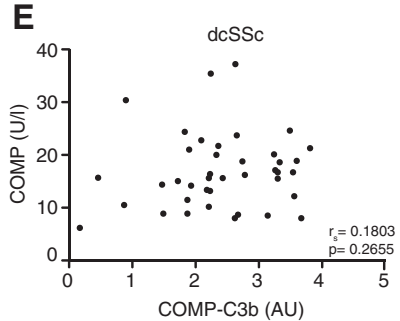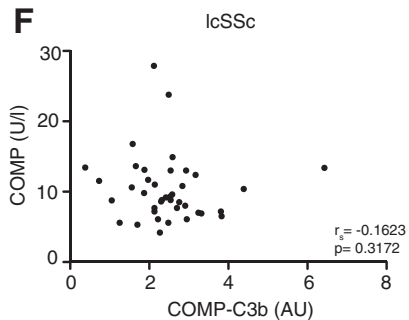

Supplement: MOESM2 [file 9696002]
